# Supplementary material
Source: publisher figshare collection journal article supplement (https://brill.figshare.com/ndownloader/files/35419271)
Supplement: Supplementary file 1 [file 35419271]

Appendix to BEH 3765: An observation of attempted infanticide and female–female cooperation in wild plains zebras (*Equus quagga*)


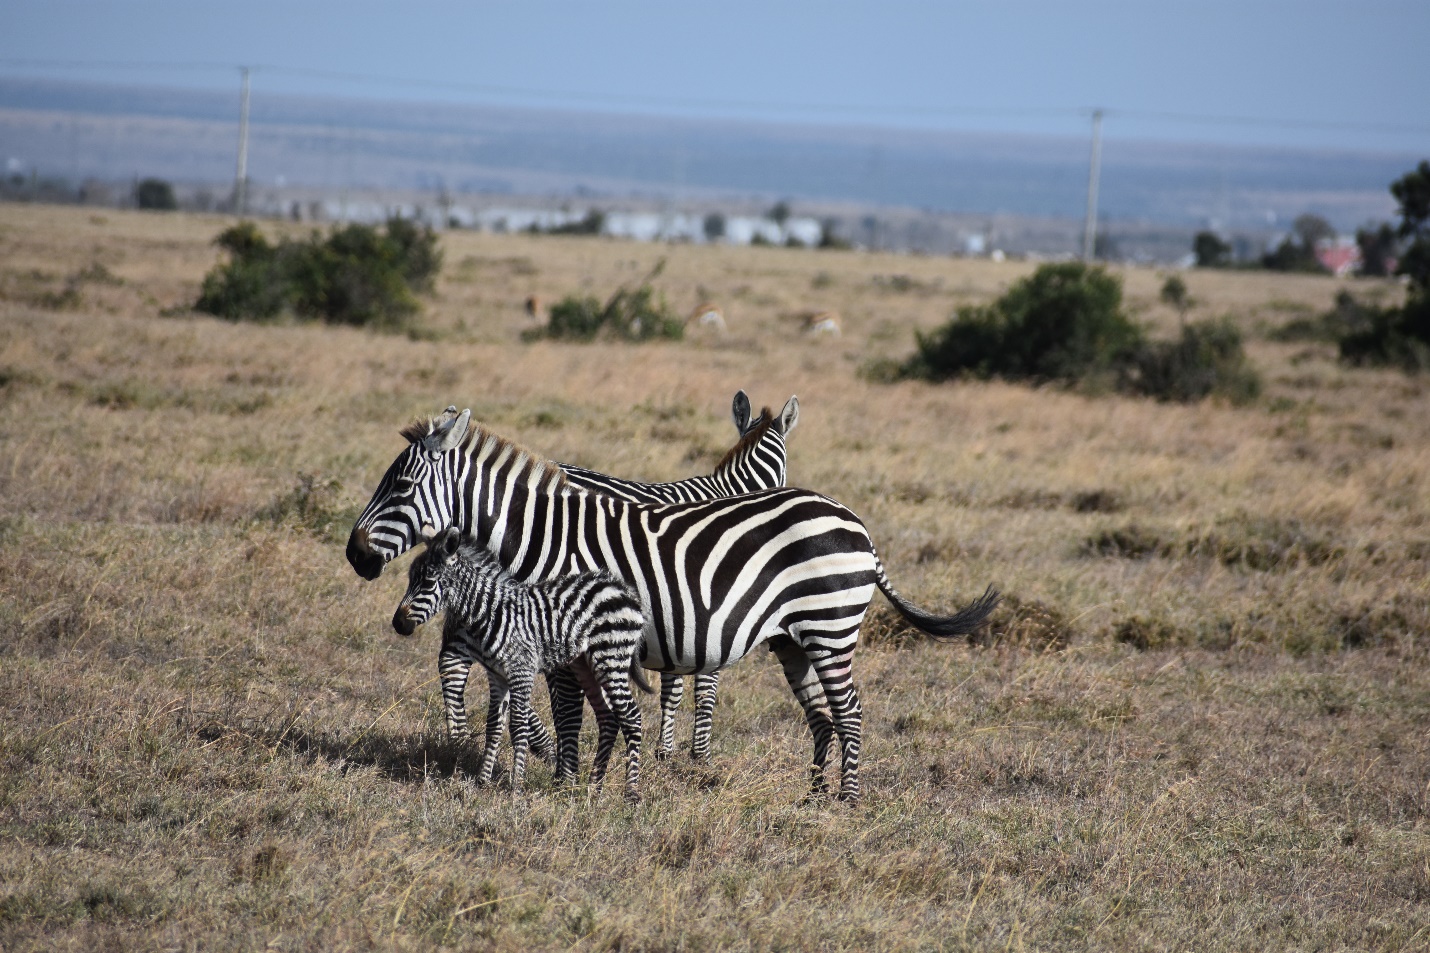


**Figure A1.** Matilda (front) and Elanor (back) when first sighted. Photo by S. Hex.


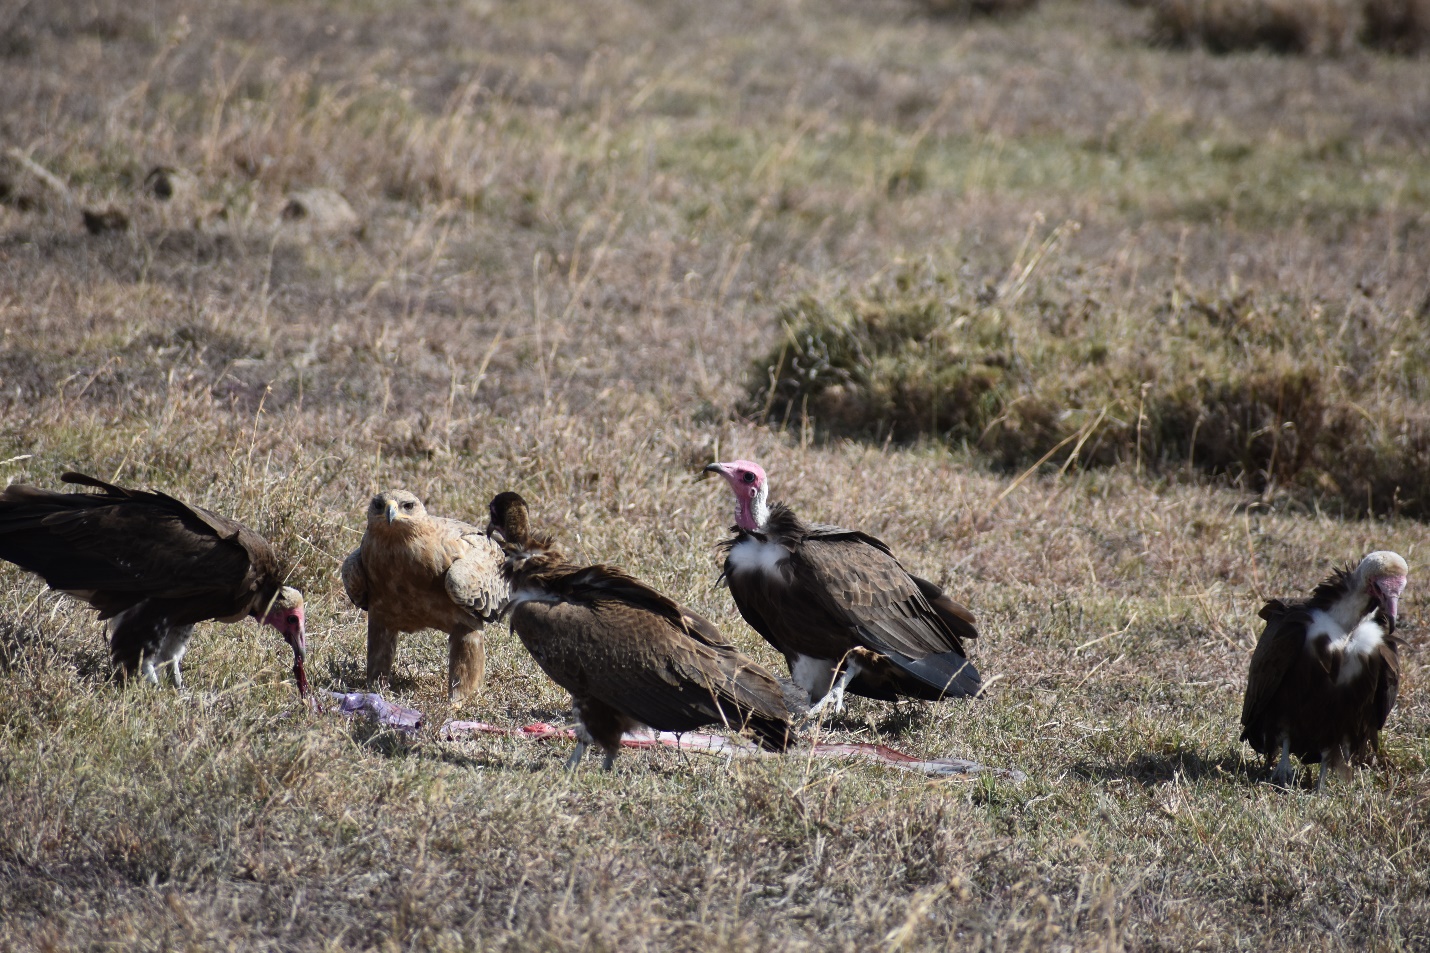


**Figure A2.** White-headed vultures (*Triconoceps occipitalis*) and a raptor feeding on fresh placenta. Photo by S. Hex.

**Video A1.** Example of Matilda (right) interposing between the foal and Aethelwulf (left). Video by M. Ng’aske. <https://youtu.be/LCPVy6KspEQ>

**Video A2.** Matilda (right) attacking Aethelwulf (left), who attacks at 0.12 seconds. Elanor interposes at 0.15 seconds. Video by M. Ng’aske. <https://youtu.be/v4ZSzC3DCQ4>

**Video A3.** Aethelwulf pursues and attacks Matilda, who swings her rump into him and kicks while keeping herself between him and the foal. Video by M. Ng’aske. <https://youtu.be/IoAJq2EgBTE>

**Video A4.** Aethelwulf pursues and attacks Matilda as she tries to pass him. Video by M. Ng’aske. <https://youtu.be/JvMP5xNGa2E>


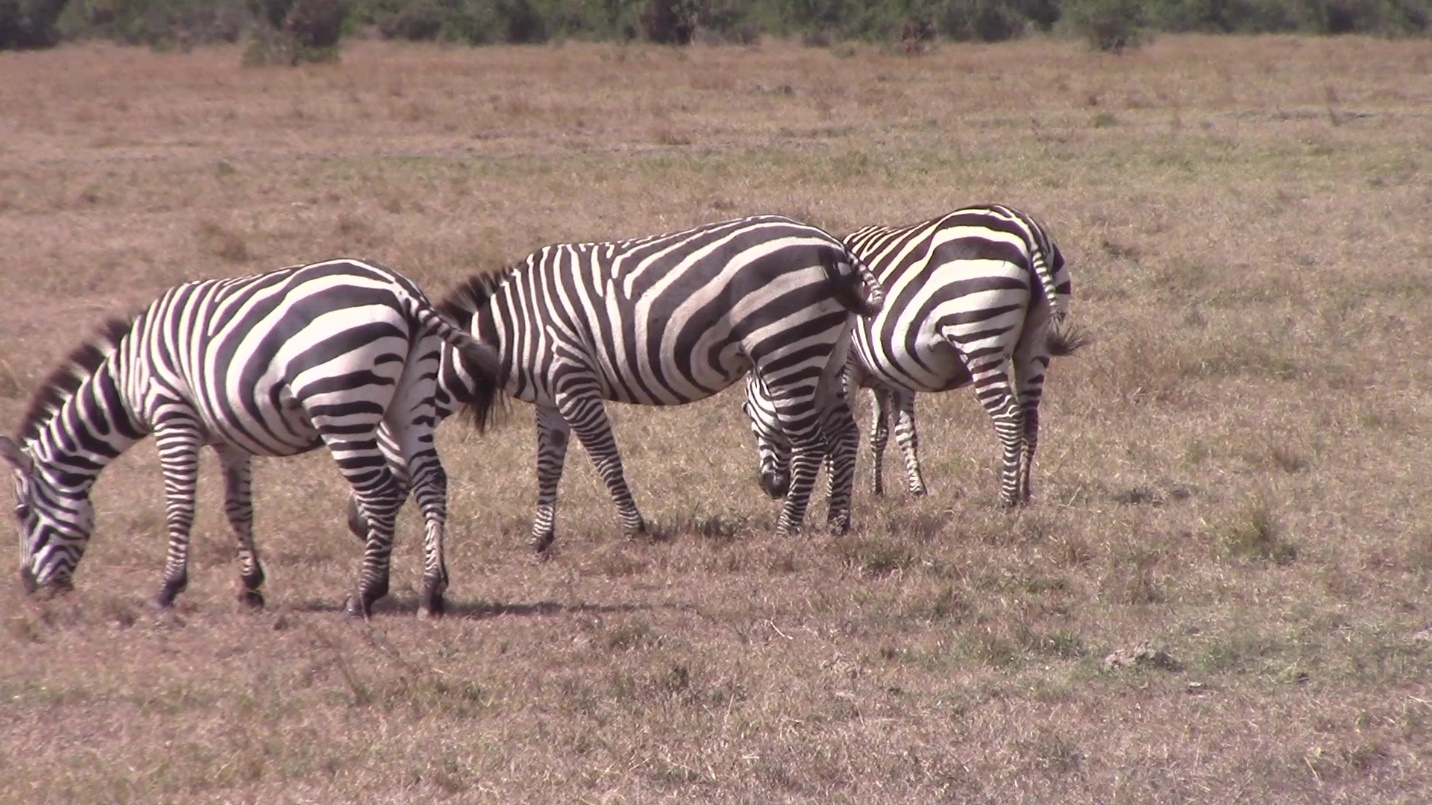


**Figure A3.** Elanor (middle) interposed between Aethelwulf (left) and Matilda (right) while grazing. Still from video by M. Ng’aske.

**Video A5.** Elanor (center) interposing between Matilda (left) and Aethelwulf (right). Video by M. Ng’aske. <https://youtu.be/CLF6JOrZ3vg>

**Video A6.** Elanor remaining interposed between Aethelwulf (front) and Matilda (back) as she moves locations. Video by M. Ng’aske. <https://youtu.be/HmnXCgbdkgo>

**Video A7.** Elanor remaining between Matilda (background) and Aethelwulf (foreground) as Matilda begins to travel. She pushes Aethelwulf away at 0.12 seconds. Video by M. Ng’aske. <https://youtu.be/-kuUGBPRI9c>

**Video A8.** Elanor interposes and kicks at Aethelwulf as Matilda moves past. Aethelwulf attacks Matilda at 0.07 seconds and Elanor interposes at 0.12 seconds. At 0.33 seconds Matilda tries to run past Aethelwulf and Elanor interposes, kicking Aethelwulf as they pass. At 0.45 seconds Aethelwulf attacks Elanor. Video by M. Ng’aske. <https://youtu.be/9bF7nvax6S4>

**Video A9.** Elanor with a foal born on August 20th, 2021, to Victoria of the Aristocrat’s harem. Video by S. Hex. <https://youtu.be/DRl4zKw29Ig>


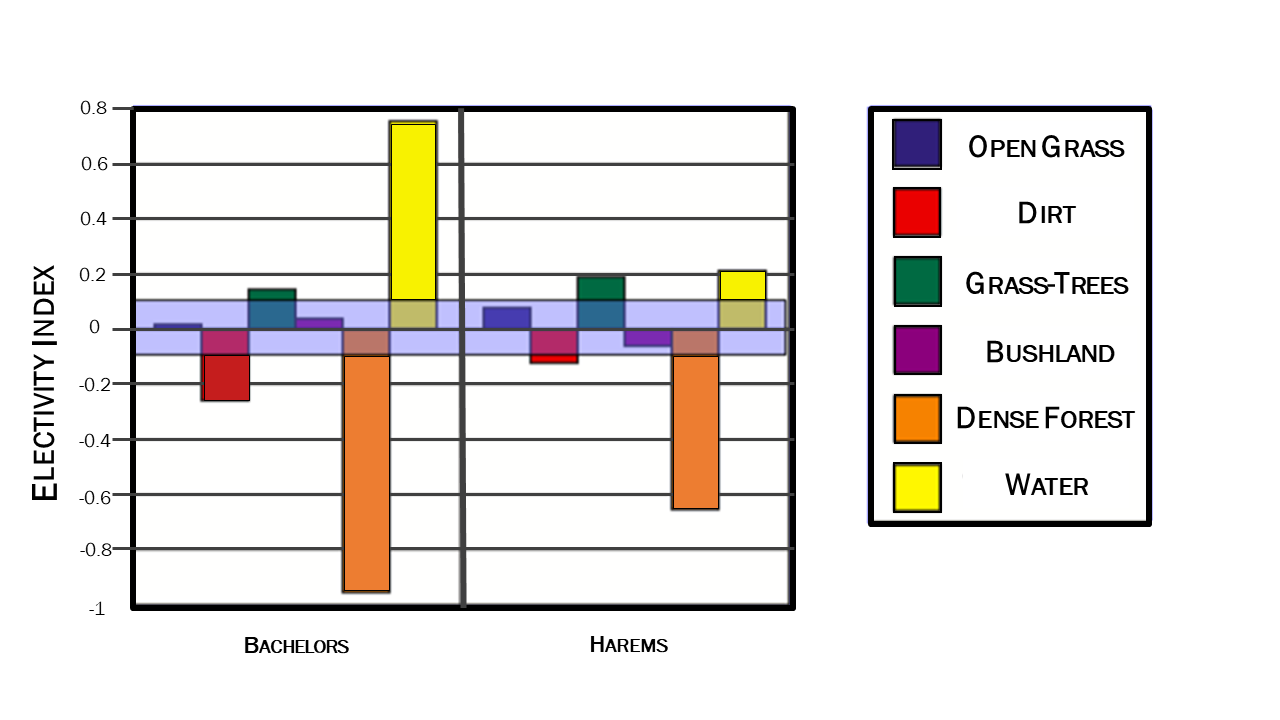


**Figure A4.** Habitat preferences by harems and bachelor groups. Habitat preferences are calculated using Ivlev’s Electivity Index (Ivlev, 1961), calculated as *Ei*= (*ri*–*pi*)/(*ri*+*pi*), where *ri* equals proportion of time that the group is found in the *i*-th habitat, and *pi*equals the proportion of the *i*-th habitat in the environment. Values range from +1 to –1, where positive values indicate strong preference, and negative values indicate strong avoidance. We denote strong differences from the null pattern of no selectivity as greater or less than 10%.

**Reference**

Ivlev. V.S. (1961). Experimental ecology of the feeding of fishes. — Yale University Press, New Haven, CT.
